# Supplementary material for: A new parallel multi-objective Harris hawk algorithm for predicting the mortality of COVID-19 patients
Source: PeerJ Comput Sci. 2023 Jun 14;9:e1430. doi: 10.7717/peerj-cs.1430 (PMC10280461; doi:10.7717/peerj-cs.1430)
Supplement: Supplemental Information 1 [file peerj-cs-09-1430-s001.xlsx]

## Sheet: KNN-with-all-features
1	96.3134
2	96.4055
3	96.4977
4	96.4055
5	96.4977
6	96.4055
7	96.3134
8	96.4977
9	96.4055
10	96.3134
11	96.3134
12	96.4977
13	96.3134
14	96.5899
15	96.4977
16	96.4977
17	96.4055
18	96.4055
19	96.3134
20	96.5899
21	96.4977
22	96.4055
23	96.4977
24	96.4977
25	96.4977
26	96.4055
27	96.4055
28	96.4977
29	96.4977
30	96.4977
31	96.3134
32	96.4055
33	96.4055
34	96.5899
35	96.4055
36	96.4055
37	96.4055
38	96.4055
39	96.4055
40	96.5899
41	96.4055
42	96.682
43	96.4055
44	96.5899
45	96.4977
46	96.4055
47	96.3134
48	96.4977
49	96.5899
50	96.3134
51	96.3134
52	96.3134
53	96.4055
54	96.3134
55	96.4055
56	96.4055
57	96.682
58	96.4055
59	96.4977
60	96.4055
61	96.4977
62	96.4977
63	96.5899
64	96.4977
65	96.4055
66	96.3134
67	96.4055
68	96.4977
69	96.4977
70	96.3134
71	96.4055
72	96.4055
73	96.4977
74	96.3134
75	96.4977
76	96.4977
77	96.5899
78	96.4977
79	96.4977
80	96.4055
81	96.4055
82	96.4055
83	96.4055
84	96.4055
85	96.4055
86	96.4055
87	96.4055
88	96.4977
89	96.5899
90	96.4055
91	96.4977
92	96.3134
93	96.3134
94	96.4977
95	96.3134
96	96.4977
97	96.4977
98	96.4977
99	96.4977
100	96.4055

## Sheet: K tests
K	1	2	3	4	5	6	7	8	9	10	12	14	16	18	20	25	30	40	50	60	70	80
	95.1152	95.2074	96.4977	95.9447	96.5899	96.3134	96.682	96.3134	96.4055	96.2212	96.4055	96.4055	96.4055	96.4055	96.4055	96.3134	96.4055	95.023	94.1935	94.1935	94.1936	94.1936
	95.3917	95.9447	96.7742	96.4977	96.4977	96.4055	96.4055	95.9447	96.5899	96.3134	96.4055	96.3134	96.4055	96.4055	96.4055	96.4055	95.3917	95.576	94.1935	94.1936	94.1936	94.1935
	95.576	95.4839	95.9447	95.8525	96.2212	96.4055	96.5899	96.682	96.3134	96.4055	96.3134	96.3134	96.4055	96.4055	96.4055	96.4055	96.3134	94.6544	94.1936	94.1936	94.1935	94.1936
	95.3917	95.8525	96.0369	95.7604	96.3134	96.682	96.2212	96.4977	96.3134	96.4055	96.3134	96.4055	96.3134	96.4055	96.4055	96.3134	96.4055	95.4839	94.1935	94.1936	94.1936	94.1935
	95.4839	95.8525	96.5899	95.6682	96.4977	96.8664	96.129	96.4055	96.5899	96.682	96.4977	96.4055	96.3134	96.4055	96.3134	96.4055	96.3134	95.1152	94.1935	94.1936	94.1936	94.1936
	95.1152	94.3779	96.3134	96.129	96.3134	96.2212	96.129	96.2212	96.4055	96.4977	96.3134	96.4055	96.4055	96.4055	96.4055	96.4055	96.4055	95.2995	94.1936	94.1936	94.1936	94.1935
	95.3917	94.5622	96.129	96.4977	96.4977	96.3134	96.4055	96.129	96.4977	96.4977	96.4977	96.4055	96.4055	96.4055	96.4055	96.3134	96.4055	95.4839	94.1936	94.1935	94.1935	94.1936
	94.8387	95.4839	96.5899	96.4055	96.129	96.8664	96.682	96.5899	96.3134	96.5899	96.4977	96.3134	96.3134	96.4055	96.4055	96.3134	96.3134	95.2995	94.1936	94.1935	94.1935	94.1936
	96.129	95.2995	96.3134	96.5899	96.5899	96.4055	96.5899	96.5899	96.4055	96.4055	96.4055	96.4055	96.4055	96.3134	96.4055	96.3134	96.4055	95.2995	94.1936	94.1936	94.1936	94.1936
	94.47	95.3917	96.4977	96.2212	96.3134	96.4977	96.4977	96.682	96.4977	96.4055	96.4977	96.4055	96.4055	96.4055	96.4055	96.4055	96.3134	94.8387	94.1936	94.1935	94.1936	94.1936
	95.1152	95.576	96.4055	96.4055	96.7742	96.3134	96.4977	96.682	96.5899	96.4055	96.4977	96.3134	96.4055	96.2212	96.4055	96.4055	96.3134	96.0369	94.1936	94.1935	94.1936	94.1936
	95.2074	95.4839	96.9585	96.4055	96.682	96.5899	96.5899	96.2212	96.4977	96.5899	96.4977	96.4055	96.4055	96.4055	96.4055	96.3134	96.4055	95.4839	94.1936	94.1936	94.1936	94.1936
	95.3917	95.576	96.4055	96.2212	96.8664	96.5899	96.5899	96.4055	96.2212	96.2212	96.4977	96.4055	96.3134	96.4055	96.4055	96.4055	96.4055	95.6682	94.1936	94.1936	94.1936	94.1936
	95.2995	95.4839	96.3134	96.129	95.9447	96.4055	96.4977	96.682	96.3134	96.4977	96.4977	96.4055	96.4055	96.3134	96.4055	96.4055	95.2995	94.1936	94.1936	94.1935	94.1936	94.1935
	95.3917	95.8525	96.8664	96.3134	96.7742	96.682	96.2212	96.4977	96.4977	96.4055	96.4055	96.4055	96.4055	96.4055	96.4055	96.4055	95.2995	95.2074	94.1936	94.1936	94.1936	94.1936
	94.3779	95.576	96.3134	96.4977	96.4977	96.3134	96.3134	95.9447	96.4055	96.4055	96.4055	96.4055	96.4055	96.4055	96.4055	96.4055	96.4055	95.023	94.1935	94.1936	94.1936	94.1935
	95.2995	94.9309	96.5899	96.5899	96.3134	96.682	96.129	96.7742	96.5899	96.4977	96.4977	96.4055	96.3134	96.4055	96.3134	96.4055	96.3134	95.2995	94.1935	94.1936	94.1936	94.1936
	95.576	95.1152	96.2212	96.3134	96.4055	95.9447	96.129	96.129	96.4055	96.4055	96.4977	96.3134	96.4055	96.4055	96.4055	96.4055	96.3134	95.4839	94.1936	94.1936	94.1935	94.1936
	95.1152	95.2995	96.3134	96.3134	96.4055	96.7742	96.2212	96.2212	96.4977	96.4055	96.3134	96.4055	96.4055	96.3134	96.4055	96.3134	96.4055	95.3917	94.1936	94.1936	94.1936	94.1935
	95.2995	95.1152	96.4977	96.3134	96.682	96.682	96.4055	96.3134	96.4977	96.4977	96.4977	96.4055	96.3134	96.3134	96.4055	96.4055	96.4055	95.4839	94.1936	94.1935	94.1935	94.1936
	95.576	95.2995	96.5899	95.9447	96.5899	96.4977	96.5899	96.4055	96.4977	96.4977	96.4055	96.4055	96.4055	96.3134	96.3134	96.4055	96.4055	95.023	94.1936	94.1936	94.1936	94.1936
	95.2074	94.9309	96.0369	96.682	96.5899	96.3134	96.0369	96.4977	96.4055	96.4977	96.4055	96.3134	96.4055	96.4055	96.4055	96.3134	96.3134	95.1152	94.1936	94.1935	94.1935	94.1936
	95.2074	95.1152	96.5899	96.0369	96.5899	96.5899	96.5899	96.4977	96.4977	96.4055	96.3134	96.3134	96.4055	96.4055	96.4055	96.4055	96.3134	94.6544	94.2857	94.1935	94.1936	94.1936
	95.2074	94.8387	96.3134	96.129	96.682	96.2212	96.4055	96.4055	96.3134	96.4055	96.4055	96.4055	96.4055	96.4055	96.2212	96.4055	96.4055	95.6682	94.1936	94.1936	94.1936	94.1936
	95.2074	95.7604	96.4977	95.7604	96.4055	96.5899	96.682	96.7742	96.4977	96.5899	96.4977	96.4055	96.4055	96.4055	96.3134	96.4055	96.4055	95.6682	94.1935	94.1936	94.1935	94.1936
	95.7604	94.7465	96.3134	96.3134	96.4055	96.2212	96.0369	96.129	96.5899	96.4977	96.3134	96.4055	96.3134	96.4055	96.3134	96.3134	96.3134	95.3917	94.1936	94.1936	94.1936	94.1935
	95.2995	94.6544	96.4055	96.2212	96.2212	96.2212	96.4055	96.4977	96.5899	96.4977	96.3134	96.4055	96.4055	96.4055	96.3134	96.4055	96.4055	95.7604	94.1935	94.1936	94.1936	94.1936
	94.8387	96.0369	96.3134	96.682	96.5899	96.4055	96.2212	96.3134	96.4055	96.4977	96.4055	96.4055	96.4055	96.4055	96.3134	96.3134	96.3134	94.8387	94.1936	94.1936	94.1936	94.1935
	95.9447	95.023	96.3134	96.129	96.2212	96.4055	96.682	96.3134	96.4055	96.4055	96.4055	96.3134	96.4055	96.3134	96.2212	96.3134	96.3134	94.9309	94.1936	94.1935	94.1936	94.1936
	95.2074	95.7604	96.5899	96.129	96.4977	96.129	96.682	96.0369	96.5899	96.3134	96.4977	96.4055	96.4055	96.4055	96.3134	96.4055	96.4055	94.7465	94.1936	94.1936	94.1936	94.1935
AVG	95.2811	95.321	96.4178	96.2366	96.4701	96.4516	96.4086	96.3932	96.4547	96.4455	96.424	96.3809	96.384	96.3809	96.3687	96.3717	96.2611	95.2381	94.1966	94.1936	94.1936	94.1936
					5.096	5.247	5.13	5.24	2.23	5.23	5.24	5.41	5.27		5.41				5.39
												94.19	#REF!

## Sheet: initial population
	initial population				After 15000 iterations
		# features	accuracy		# features	accuracy
	1	24	96.7742		19	97.6959
	2	16	95.7604		19	97.788
	3	13	94.1936		19	97.6959
	4	17	95.4839		20	97.788
	5	20	96.5899		19	97.788
	6	17	96.4055		18	97.6959
	7	23	96.5899		19	97.8802
	8	17	95.9447		19	97.8802
	9	11	91.1521		18	97.788
	10	16	94.3779		18	97.6959
	11	21	95.023		17	97.6959
	12	19	96.5899		16	97.6959
	13	16	94.7465		15	97.788
	14	16	96.5899		18	97.788
	15	22	95.9447		16	97.6959
	16	12	94.5622		15	97.6959
	17	17	95.576		19	97.788
	18	17	94.1014		16	97.788
	19	16	97.0507		14	97.6959
	20	17	96.3134		20	97.6959
	21	18	96.4055		15	97.788
	22	18	96.2212		14	97.788
	23	17	95.8525		21	97.788
	24	22	96.129		16	97.8802
	25	20	94.8387		17	97.788
	26	14	96.129		16	97.788
	27	13	95.576		14	97.788
	28	21	96.682		20	97.8802
	29	19	95.2995		19	97.9724
	30	14	96.3134		19	97.9724
		17.4333	95.6406		17.5	97.7819			2.14133
					max	97.8802		time:

## Sheet: augmented
	initial population				After 15000 iterations
		# features	accuracy		# features	accuracy
	1	14	93.8655		21	98.0672
	2	17	95.5462		20	97.9832
	3	22	96.3025		19	97.9832
	4	17	97.7311		23	97.8992
	5	18	94.958		18	97.9832
	6	16	96.5546		20	97.8992
	7	13	93.7815		19	97.8992
	8				17	97.9832
	9	17	95.2101		16	97.9832
	10				18	97.9832
	11	18	93.7815		19	98.0672
	12	16	96.6387		18	97.8992
	13	16	94.6218		17	97.9832
	14	16	95.7983		16	97.9832
	15	20	94.1176		19	97.9832
	16	18	95.7983		22	97.9832
	17	14	95.042		21	97.9832
	18	19	96.6386		19	98.0672
	19	21	95.8824		20	98.0672
	20	14	88.6555		20	97.9832
	21	16	94.2857		18	97.9832
	22	17	94.2017		18	98.0672
	23	19	96.2185		17	97.9832
	24	20	94.2857		18	98.0672
	25	18	94.1176		18	98.1513
	26	18	96.1345		15	97.9832
	27	15	96.2185		15	97.9832
	28	15	94.2017		18	98.0672								34	18.6	15.4
	29	13	94.1176		23	98.0672
	30	20	94.4538		17	98.0672										0.452941
		17.0357	94.97	#DIV/0!	18.6333	98.0028		3.03282	1.59762
																						15000	64	960000
					max	98.0672		time:		0.285313
										1.13333

## Sheet: original-augmented comparison
	Original data				Augmented data
		# features	accuracy		# features	accuracy
	1	19	97.6959		21	98.0672
	2	19	97.788		20	97.9832
	3	19	97.6959		19	97.9832
	4	20	97.788		23	97.8992
	5	19	97.788		18	97.9832
	6	18	97.6959		20	97.8992
	7	19	97.8802		19	97.8992
	8	19	97.8802		17	97.9832
	9	18	97.788		16	97.9832
	10	18	97.6959		18	97.9832
	11	17	97.6959		19	98.0672
	12	16	97.6959		18	97.8992
	13	15	97.788		17	97.9832
	14	18	97.788		16	97.9832
	15	16	97.6959		19	97.9832
	16	15	97.6959		22	97.9832
	17	19	97.788		21	97.9832
	18	16	97.788		19	98.0672
	19	14	97.6959		20	98.0672
	20	20	97.6959		20	97.9832
	21	15	97.788		18	97.9832
	22	14	97.788		18	98.0672
	23	21	97.788		17	97.9832
	24	16	97.8802		18	98.0672
	25	17	97.788		18	98.1513
	26	16	97.788		15	97.9832
	27	14	97.788		15	97.9832
	28	20	97.8802		18	98.0672
	29	19	97.9724		23	98.0672
	30	19	97.9724		17	98.0672
